# Supplementary material for: Serial neurocognitive changes following transcatheter aortic valve replacement: comparison between low and intermediate-high risk groups
Source: publisher site journal article supplement (doi:10.18632/aging.204202), 2022-08-05
Supplement: Supplementary file [file aging-v14i15-204202-supplementary-material-SD1.pdf]

**SUPPLEMENTARY FIGURE**

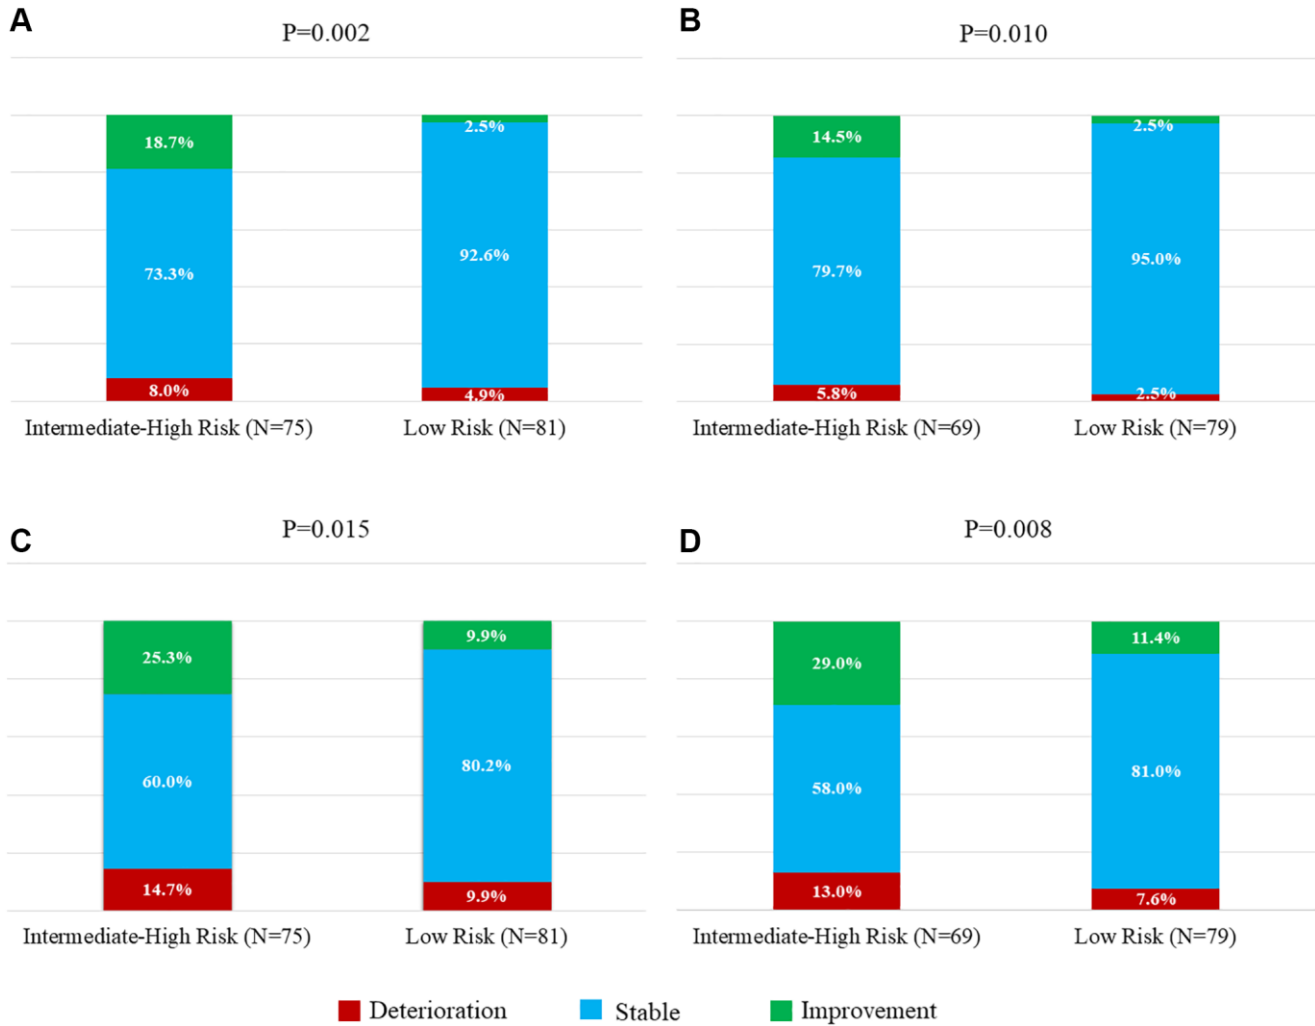

**Supplementary Figure 1. Percentage of patients with changes in NIHSS and Barthel index.** Deterioration or improvement was defined as score increase or decrease in the NIHSS. (A) Baseline to 3 months. (B) Baseline to 1 year. Deterioration or improvement was defined as score decrease or increase in the Barthel index. (C) Baseline to 3 months. (D) Baseline to 1 year. Abbreviation: NIHSS: National Institutes of Health Stroke Scale.
