# Supplementary material for: Serial neurocognitive changes following transcatheter aortic valve replacement: comparison between low and intermediate-high risk groups
Source: Aging (Albany NY). 2022 Aug 5;14(15):6111–27. doi: 10.18632/aging.204202 (PMC9417238; doi:10.18632/aging.204202)
Supplement: Supplementary Tables [file aging-14-204202-s002.pdf]

## SUPPLEMENTARY TABLES

**Supplementary Table 1. Comparison of baseline characteristics between excluded and included patients.**

|                                           | Excluded patients (N = 33) | Study cohort (N = 156) | P value |
|-------------------------------------------|----------------------------|------------------------|---------|
| Female sex                                | 21 (63.6%)                 | 88 (56.4%)             | 0.445   |
| Age (year)                                | 82.3 ± 8.8                 | 80.2 ± 7.8             | 0.169   |
| Body mass index, kg/m <sup>2</sup>        | 23.6 ± 4.6                 | 24.3 ± 4.3             | 0.416   |
| Hypertension                              | 24 (72.7%)                 | 99 (63.5%)             | 0.310   |
| Diabetes mellitus                         | 13 (39.4%)                 | 55 (35.3%)             | 0.653   |
| Hyperlipidemia                            | 9 (27.3%)                  | 41 (26.3%)             | 0.907   |
| Coronary artery disease                   | 16 (48.5%)                 | 63 (40.4%)             | 0.391   |
| Peripheral artery disease                 | 7 (21.2%)                  | 19 (12.2%)             | 0.171   |
| Prior myocardial infarction               | 3 (9.1%)                   | 4 (2.6%)               | 0.103   |
| Prior stroke or transient ischemic attack | 6 (18.2%)                  | 10 (6.4%)              | 0.039   |
| Chronic kidney disease                    | 14 (42.4%)                 | 47 (30.1%)             | 0.170   |
| Chronic lung disease                      | 1 (3.0%)                   | 12 (7.7%)              | 0.336   |
| Permanent pacemaker                       | 1 (3.0%)                   | 7 (4.5%)               | 1.000   |
| EuroSCORE II, %                           | 10.4 ± 10.1                | 3.9 ± 3.2              | <0.0001 |
| STS-PROM, %                               | 7.8 ± 4.3                  | 5.1 ± 3.9              | 0.0006  |
| NYHA Fc 3/4                               | 33 (100%)                  | 121 (77.6%)            | 0.001   |
| Echocardiography                          |                            |                        |         |
| LVEF, %                                   | 65.2 ± 14.1                | 65.0 ± 13.0            | 0.939   |
| Aortic valve area, cm <sup>2</sup>        | 0.76 ± 0.21                | 0.77 ± 0.18            | 0.730   |
| Mean pressure gradient, mmHg              | 42.2 ± 22.6                | 42.6 ± 17.6            | 0.918   |

Values are *n* (%) or mean ± SD. Abbreviations: Euroscore: European System for Cardiac Operative Risk Evaluation; STS-PROM: Society of Thoracic Surgeons Predicted Risk of Mortality; NYHA Fc: New York Heart Association functional class; LVEF: left ventricular ejection fraction.

**Supplementary Table 2. Baseline characteristics in intermediate-high and low risk group.**

|                                           | Intermediate-high risk (N = 75) | Low risk (N = 81) | P value |
|-------------------------------------------|---------------------------------|-------------------|---------|
| Female sex                                | 46 (61.3%)                      | 42 (51.9%)        | 0.233   |
| Age (year)                                | 82.9 ± 6.8                      | 77.6 ± 7.8        | <0.0001 |
| Body mass index, kg/m <sup>2</sup>        | 23.3 ± 3.9                      | 25.3 ± 4.4        | 0.0035  |
| Hypertension                              | 48 (64.0%)                      | 51 (62.9%)        | 0.893   |
| Diabetes mellitus                         | 34 (45.3%)                      | 21 (25.9%)        | 0.011   |
| Hyperlipidemia                            | 17 (22.7%)                      | 24 (29.6%)        | 0.324   |
| Coronary artery disease                   | 37 (49.3%)                      | 26 (32.1%)        | 0.028   |
| Peripheral artery disease                 | 14 (18.7%)                      | 5 (6.2%)          | 0.017   |
| Prior myocardial infarction               | 3 (4.0%)                        | 1 (1.2%)          | 0.352   |
| Prior stroke or transient ischemic attack | 7 (9.3%)                        | 3 (3.7%)          | 0.352   |
| Chronic kidney disease                    | 37 (49.3%)                      | 10 (12.4%)        | <0.0001 |
| Chronic lung disease                      | 5 (6.7%)                        | 7 (8.6%)          | 0.644   |

|                                    |             |             |         |
|------------------------------------|-------------|-------------|---------|
| Permanent pacemaker                | 4 (5.3%)    | 3 (3.7%)    | 0.711   |
| EuroSCORE II, %                    | 5.6 ± 3.8   | 2.4 ± 1.1   | <0.0001 |
| STS-PROM, %                        | 8.1 ± 3.8   | 2.4 ± 0.8   | <0.0001 |
| NYHA Fc 3/4                        | 70 (93.3%)  | 51 (63.0%)  | <0.0001 |
| Echocardiography                   |             |             |         |
| LVEF, %                            | 63.3 ± 15.1 | 66.7 ± 10.4 | 0.126   |
| Aortic valve area, cm <sup>2</sup> | 0.75 ± 0.20 | 0.79 ± 0.15 | 0.176   |
| Mean pressure gradient, mmHg       | 42.9 ± 19.6 | 42.2 ± 15.6 | 0.821   |

Values are *n* (%) or mean ± SD. Abbreviations: Euroscore: European System for Cardiac Operative Risk Evaluation; STS-PROM: Society of Thoracic Surgeons Predicted Risk of Mortality; NYHA Fc: New York Heart Association functional class; LVEF: left ventricular ejection fraction.

**Supplementary Table 3. Comparison of procedural characteristics and clinical outcomes between low and intermediate-high risk groups.**

|                                     | Intermediate-high risk ( <i>N</i> = 75) | Low risk ( <i>N</i> = 81) | <i>P</i> Value |
|-------------------------------------|-----------------------------------------|---------------------------|----------------|
| Trans-femoral Approach              | 75 (100.0%)                             | 81 (100.0%)               | 1.000          |
| Valve Type                          |                                         |                           | 0.059          |
| CoreValve/ Evolute R                | 39 (52.0%)                              | 29 (35.8%)                |                |
| Sapien XT/ Sapien 3                 | 29 (38.7%)                              | 46 (56.8%)                |                |
| Lotus                               | 6 (8.0%)                                | 3 (3.7%)                  |                |
| Portico                             | 1 (1.3%)                                | 3 (3.7%)                  |                |
| Need for 2nd Valve                  | 1 (1.3%)                                | 2 (2.5%)                  | 1.000          |
| Total contrast medium used, ml      | 170.8 ± 50.5                            | 168.3 ± 65.7              | 0.801          |
| Total procedural time, min          | 102.6 ± 35.8                            | 93.9 ± 37.8               | 0.146          |
| In-hospital outcome                 |                                         |                           |                |
| Acute kidney injury                 | 3 (5.4%)                                | 4 (4.9%)                  | 1.000          |
| New LBBB                            | 29 (38.7%)                              | 12 (14.8%)                | 0.001          |
| New permanent pacemaker             | 11 (14.7%)                              | 3 (3.7%)                  | 0.023          |
| Vascular complication, major        | 3 (4.0%)                                | 1 (1.2%)                  | 0.358          |
| 1 Year Clinical outcome,            |                                         |                           |                |
| Death                               | 6 (8.0%)                                | 2 (2.5%)                  | 0.155          |
| Cardiovascular Death                | 1 (1.3%)                                | 0 (0.0%)                  | 0.481          |
| Rehospitalization                   | 27 (36.0%)                              | 16 (19.8%)                | 0.124          |
| Heart failure rehospitalization     | 8 (10.7%)                               | 6 (7.4%)                  | 0.477          |
| Stroke or transient ischemic attack | 2 (2.7%)                                | 0 (0.0%)                  | 0.230          |

Values are *n* (%), mean ± SD or median (interquartile range). Abbreviation: LBBB: left bundle branch block.

**Supplementary Table 4. Comparison of baseline neurologic and cognitive assessments between low and intermediate-high risk groups.**

|                               | Intermediate-high risk ( <i>N</i> = 75) | Low risk ( <i>N</i> = 81) | <i>P</i> Value |
|-------------------------------|-----------------------------------------|---------------------------|----------------|
| NIHSS                         |                                         |                           |                |
| Score                         | 0 (0–0)                                 | 0 (0–0)                   | 0.001          |
| Number of score > 0           | 16 (21.3%)                              | 2 (2.5%)                  | <0.0001        |
| Barthel index                 |                                         |                           |                |
| Score                         | 100 (85–100)                            | 100 (100–100)             | 0.0012         |
| Number of score < 100         | 28 (37.3%)                              | 12 (14.8%)                | 0.001          |
| MMSE                          |                                         |                           |                |
| Score                         | 25 (22–29)                              | 29 (25–30)                | <0.0001        |
| Number of score < 26          | 39 (52.0%)                              | 22 (27.2%)                | 0.001          |
| ADAS-cog                      | 7 (3–11)                                | 1 (0–7)                   | <0.0001        |
| Color Trail Test A (category) | 8 (6–8)                                 | 6 (3–8)                   | 0.023          |
| Color Trail Test B (category) | 8 (8–8)                                 | 8 (4–8)                   | 0.121          |
| Verbal fluency                | 24.9 ± 9.9                              | 30.4 ± 8.2                | 0.0002         |

Values are number (%), median (interquartile range) or mean (standard deviation) if normally distributed. Abbreviations: NIHSS: National Institutes of Health Stroke Scale; ADAS-cog: Alzheimer Disease Assessment Scale–Cognitive Subtest; MMSE: Mini-Mental State Examination score.
